# Supplementary figures and images for: Morphine Pharmacodynamics in Mechanically Ventilated Preterm Neonates Undergoing Endotracheal Suctioning
Source: PubMed Central journal article supplement — CPT Pharmacometrics Syst Pharmacol. 2017 Jan 21;6(4):239–48. doi: 10.1002/psp4.12156 (PMC5397563; doi:10.1002/psp4.12156), 2017-01-21

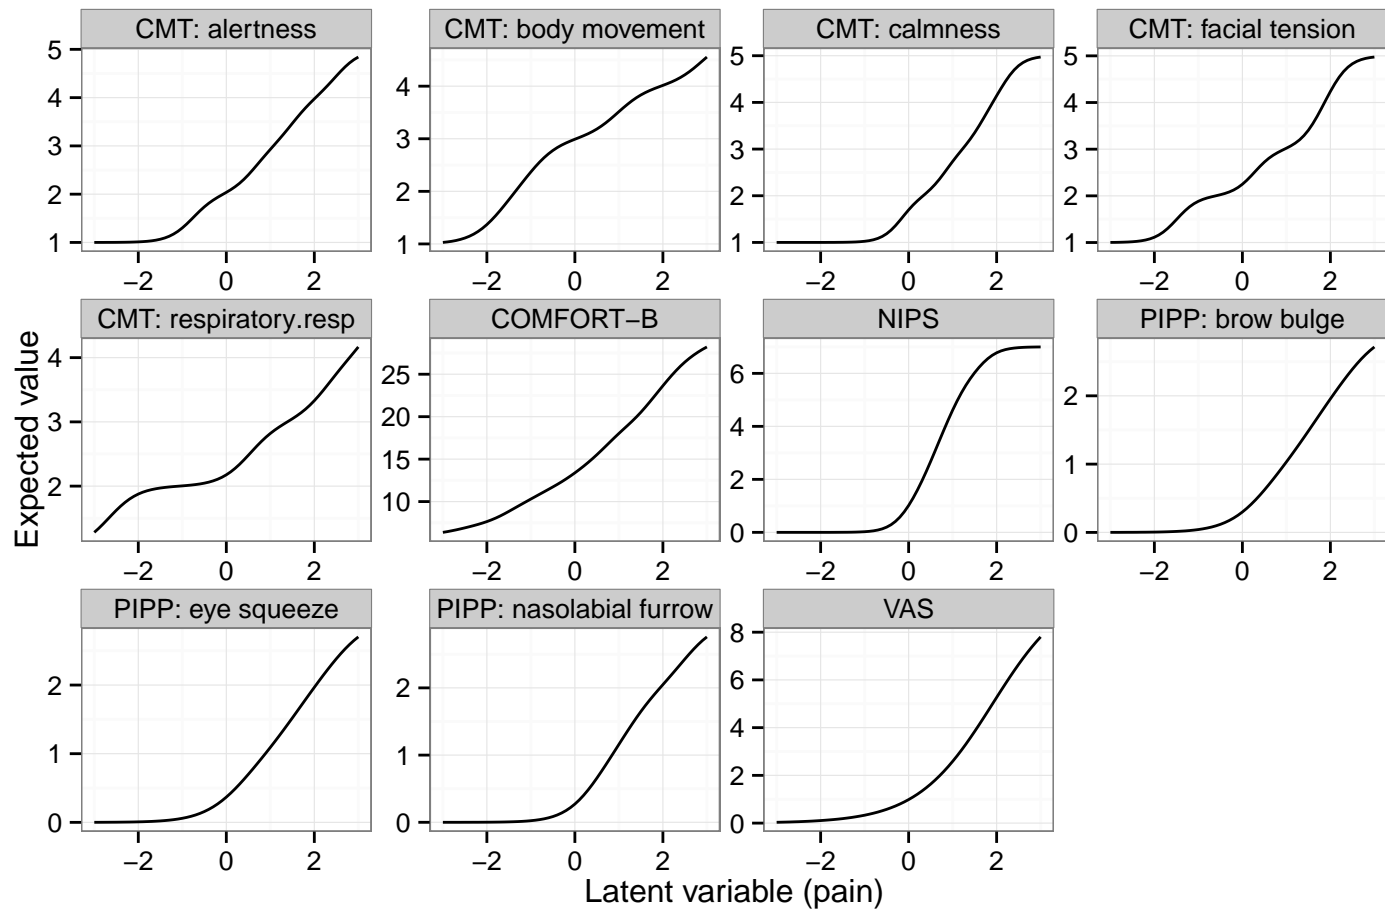

Supplement: PSP4-6-239-s002.pdf [file PSP4-6-239-s002.pdf]
